# Supplementary material for: Quantification of surface water volume changes in theMackenzie Delta using satellite multi-mission data
Source: Copernicus journal article supplement (doi:10.5194/hess-2017-170), 2017-05-29

*Supplement of information*

**Quantification of surface water volume changes in the Mackenzie  
Delta using satellite multi-mission data**

5 Cassandra Normandin<sup>1</sup>, Frédéric Frappart<sup>2, 3</sup>, Bertrand Lubac<sup>1</sup>, Simon Bélanger<sup>4</sup>, Vincent Marieu<sup>1</sup>, Fabien  
Blarel<sup>3</sup>, Arthur Robinet<sup>1</sup> and Léa Guiastrennec-Faugas<sup>1</sup>

<sup>1</sup> EPOC, UMR 5805, Université de Bordeaux, Allée Geoffroy Saint-Hilaire, 33615 Pessac, France

<sup>2</sup> GET-GRGS, UMR 5563, CNRS/IRD/UPS, Observatoire Midi-Pyrénées, 31400 Toulouse, France

<sup>3</sup> LEGOS-GRGS, UMR 5566, CNRS/IRD/UPS, Observatoire Midi-Pyrénées, 31400 Toulouse, France

10 <sup>4</sup> Dép. Biologie, Chimie et Géographie, groupe BOREAS and Québec-Océan, Université du Québec à Rimouski, 300 allée des  
ursulines, Rimouski, Qc, G5L 3A1, Canada

*Correspondence to:* Cassandra Normandin (cassandra.normandin@u-bordeaux.fr)

**Figure S1: Index map and associated histogram in July 2013 for (a) EVI for MODIS, (b) EVI for OLI 500, (c) LSWI for MODIS and (d) LSWI for OLI 500**

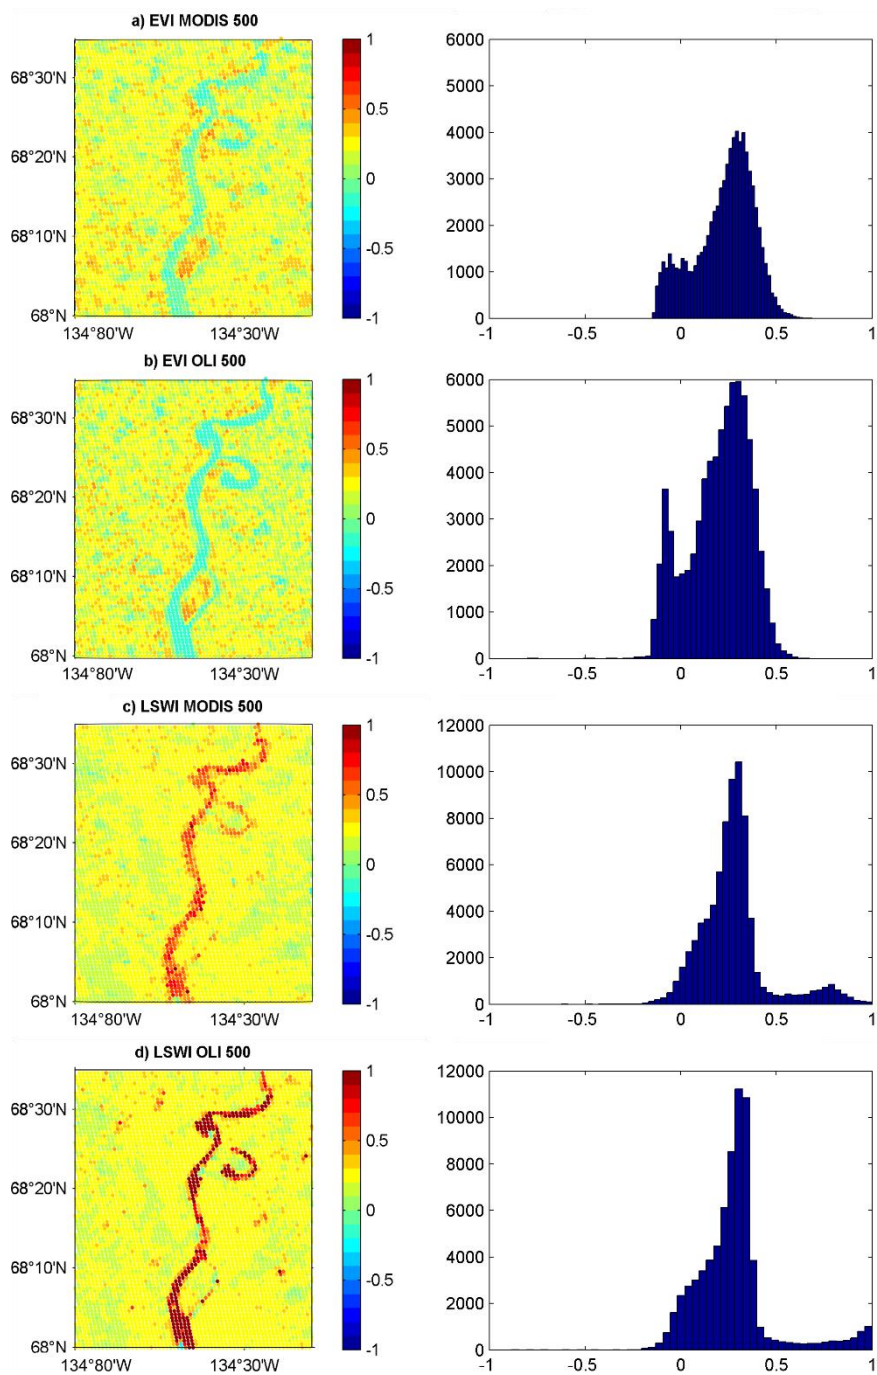

Figure S2: Map of difference between EVI and LSWI indices and associated histogram in July 2013 for (a) MODIS and (b) OLI 500

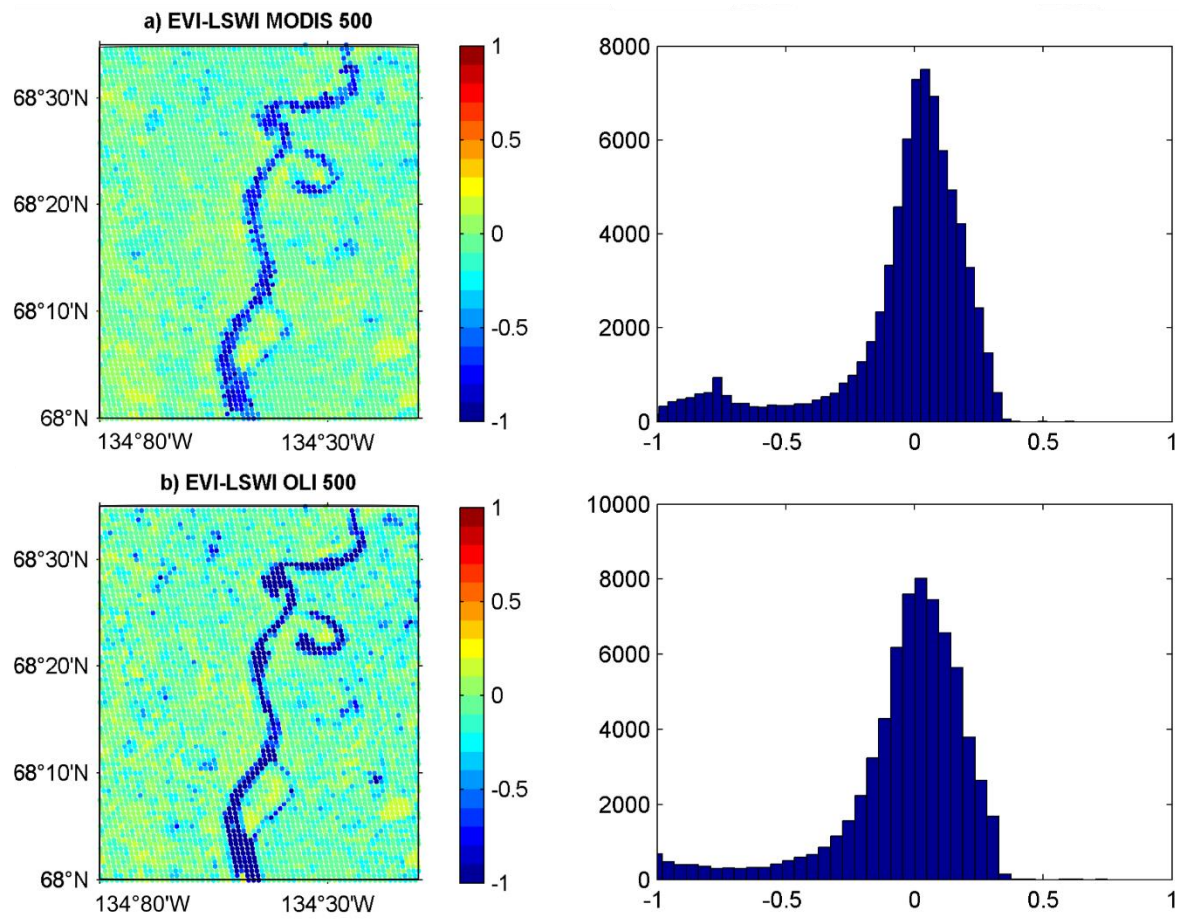

**Figure S3: Surface water extent estimated in July 2013 using (a) MODIS at 500 m (b) OLI at 500 m and (c) OLI at 30 m. Permanent water bodies appear in blue and inundated areas in light blue.**

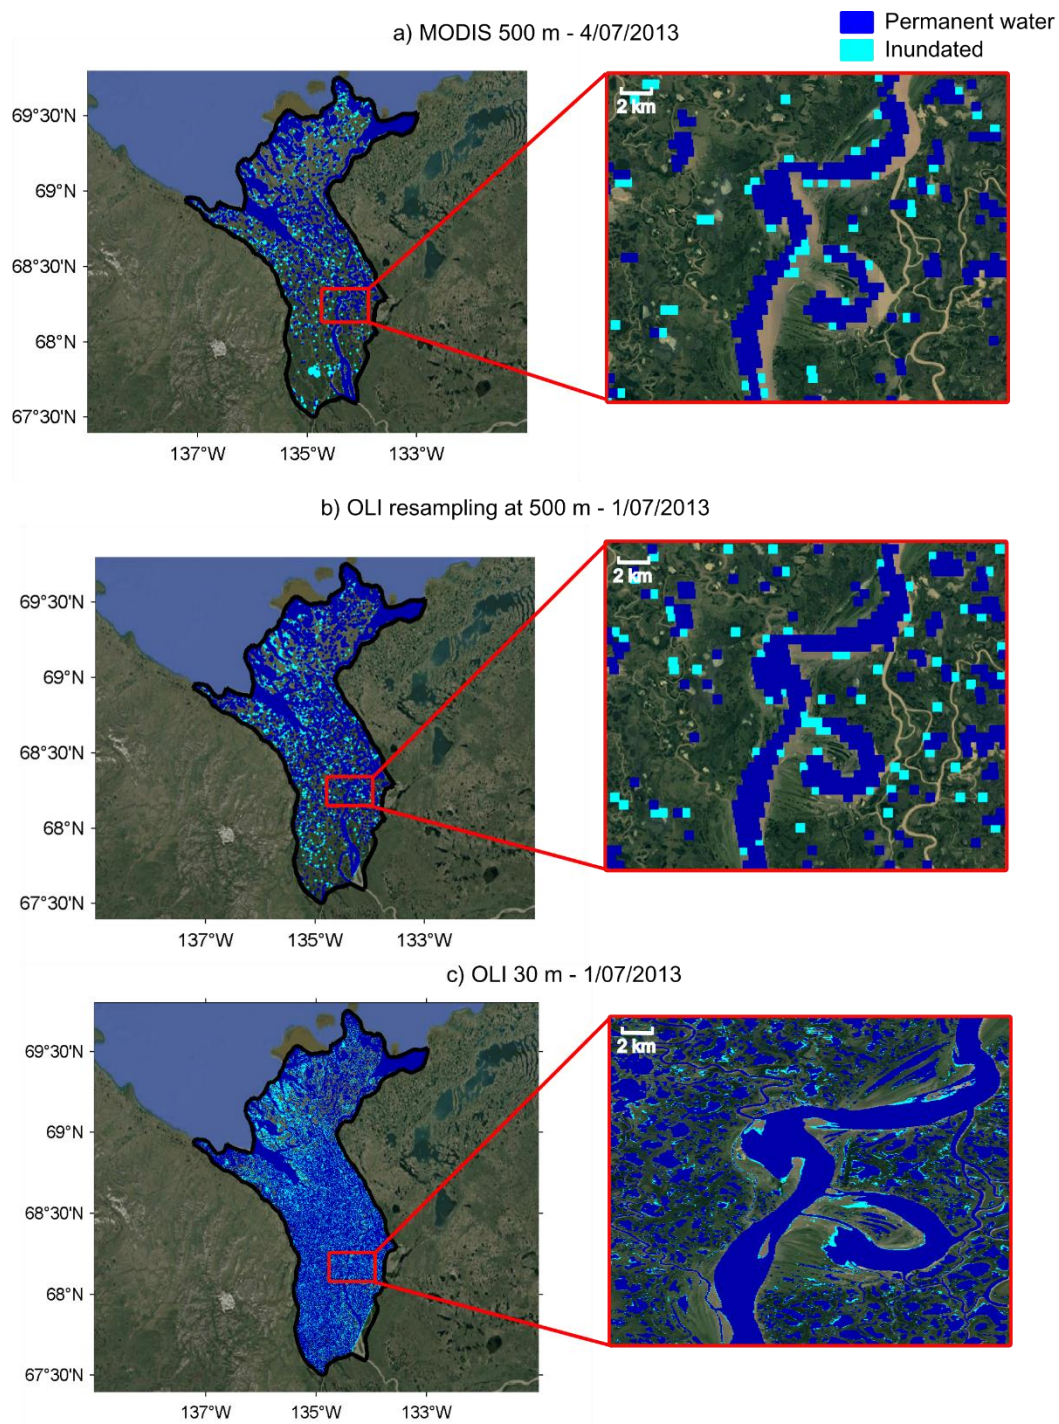

**Figure S4: Comparisons of surface water areas detected using MODIS at 500 m and Landsat-8 images resampled at 500 m of spatial resolution for Landsat-8 images acquired on 04/07/2013 (a) and 05/08/2013 (b). Surface water only detected using MODIS, Landsat-8 resampled and detected by both appears in blue, light blue and yellow respectively.**

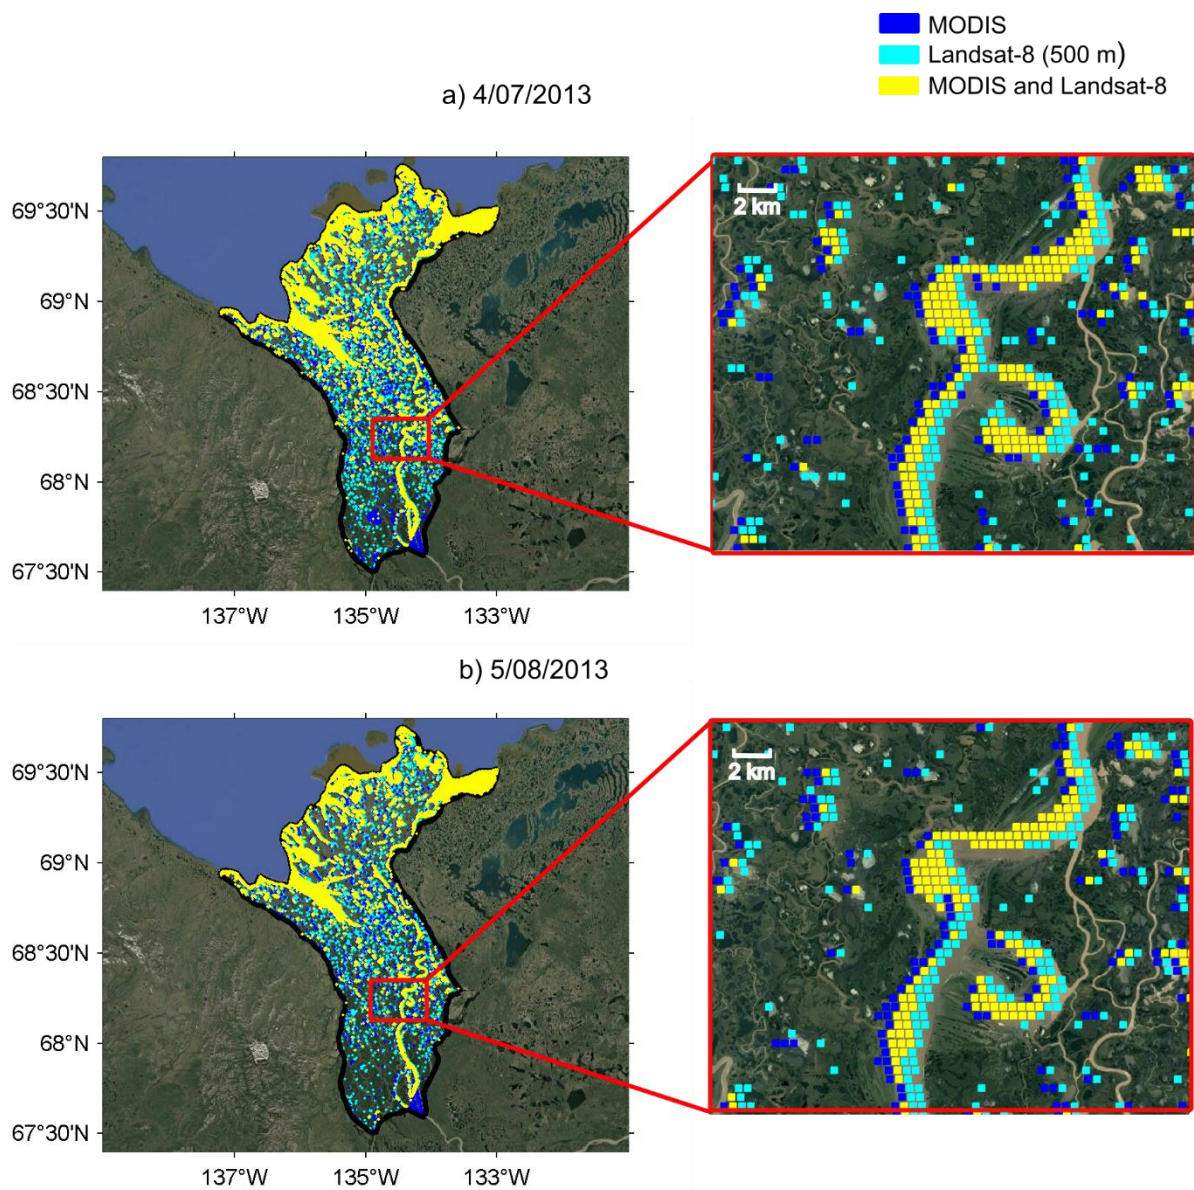

Supplement: Supplementary file [file hess-2017-170-AC2-supplement.pdf]
